1 **In-kind nutritional supplementation for household contacts of persons with tuberculosis would be**  
2 **cost-effective for reducing tuberculosis incidence and mortality in India: a modeling study**

---

3  
4  
5 Pranay Sinha<sup>1,2</sup>, Madolyn Dauphinais<sup>2</sup>, Madeline E. Carwile<sup>2</sup>, C. Robert Horsburgh, Jr.<sup>1,2,3</sup> Nicolas A.  
6 Menzies<sup>4,5</sup>

7  
8 1. Section of Infectious Diseases, Department of Medicine, Boston University Chobanian &  
9 Avedisian School of Medicine, MA, USA

10 2. Boston Medical Center, Boston, MA, USA

11 3. Department of Epidemiology, Boston University School of Public Health, MA, USA

12 4. Center for Health Decision Sciences, Harvard TH Chan School of Public Health, Boston, MS,  
13 USA

14 5. Department of Global Health and Population, Harvard TH Chan School of Public Health,  
15 Boston, MA, USA

16  
17 \* Corresponding author

18 Abstract word count:249/250 word | Body word count: 3369/3500 words | References: 30/30

19  
20 **Keywords:** Nutritional supplementation, tuberculosis, undernutrition, India, Health Economics

21 **Running title:** Nutritional supplementation for TB prevention

22 **Corresponding author:** Pranay Sinha, 801 Massachusetts Ave, Crosstown Building, Suite 2021A, Boston,  
23 MA, USA 02119; email: psinha@bu.edu; phone: 516-633-9920

24  
25 **Summary:** Undernutrition is the leading cause of tuberculosis in India. Using a Markov state-transition  
26 model, we found that food baskets for household contacts of persons with tuberculosis would be cost-  
27 effective in reducing tuberculosis incidence and mortality in India.

28  
29 **Research in context**

30 *Evidence before this study:* Undernutrition is the leading risk factor for TB worldwide. Recently, the  
31 RATIONS study demonstrated a roughly 40% reduction in incident TB among household contacts who  
32 received in-kind macronutrient and micronutrient supplementation.

33  
34 *Added value of this study:* Although the RATIONS study demonstrated a dramatic reduction in incident  
35 TB, it is unclear if nutritional interventions to prevent TB are cost-effective. Previously, only one cost-  
36 effectiveness analysis of nutritional interventions for household contacts has been published. Due to lack  
37 of published data, that study had to make assumptions regarding the impact of nutritional interventions on  
38 TB incidence and mortality. In this study, we conducted an economic evaluation of a RATIONS-style  
39 intervention to reduce incident TB and mortality in India using observed data.

40  
41 *Implications of all the available evidence:* In-kind nutritional supplementation for household contacts of  
42 individuals with TB disease would be cost-effective in reducing incident TB and TB mortality,  
43 particularly if TB programs leverage economies of scale to bring down the cost of the nutritional  
44 intervention.

47 **ABSTRACT**

48 **Background:** Undernutrition is the leading cause of tuberculosis (TB) globally, but nutritional  
49 interventions are often considered cost prohibitive. The RATIONS study demonstrated that nutritional  
50 support provided to household contacts of persons with TB can reduce TB incidence. However, the long-  
51 term cost-effectiveness of this intervention is unclear.

52 **Methods:** We assessed the cost-effectiveness of a RATIONS-style intervention (daily 750 kcal dietary  
53 supplementation and multi-micronutrient tablet). Using a Markov state transition model we simulated  
54 TB incidence, treatment, and TB-attributable mortality among household contacts receiving the  
55 RATIONS intervention, as compared to no nutritional support. We calculated health outcomes (TB cases,  
56 TB deaths, and disability-adjusted life years [DALYs]) over the lifetime of intervention recipients and  
57 assessed costs from government and societal perspectives. We tested the robustness of results to  
58 parameter changes via deterministic and probabilistic sensitivity analysis.

59 **Findings:** Over two years, household contacts receiving the RATIONS intervention would experience 39%  
60 (95% uncertainty interval (UI): 23–52) fewer TB cases and 59% (95% UI: 44–69) fewer TB deaths. The  
61 intervention was estimated to avert 13,775 (95% UI: 9036–20,199) TB DALYs over the lifetime of the  
62 study cohort comprising 100,000 household contacts and was cost-effective from both government  
63 (incremental cost-effectiveness ratio: \$229 per DALY averted [95% UI: 133–387]) and societal  
64 perspectives (\$184 per DALY averted [95% UI: 83–344]). The results were most sensitive to the cost of  
65 the nutritional supplement.

66 **Interpretation**

67 Prompt nutritional support for household contacts of persons with TB disease would be cost-effective in  
68 reducing TB incidence and mortality in India.

69  
70  
71  
72

73 **INTRODUCTION**

74 Tuberculosis (TB) has regained its position as the leading infectious cause of death worldwide, with 10.6  
75 million cases and 1.3 million deaths in 2022.(1) Undernutrition blunts the innate and adaptive immune  
76 response to *Mycobacterium tuberculosis*, the pathogen that causes TB.(2) At least 2.2 million of 10.6  
77 million TB cases are attributable to undernutrition, making it the leading risk factor for TB.(1) There is  
78 also evidence that, among individuals diagnosed with TB disease, undernourished individuals face higher  
79 risks of death, treatment failure, and relapse despite undergoing antimycobacterial therapy.(2, 3)  
80 Historical data suggest that nutritional supplementation could have a beneficial role by reducing the  
81 incidence of TB disease and reducing case fatality among those with TB disease.(2) However, in the  
82 absence of contemporary empirical data, nutritional supplementation for persons with TB (PWTB) and  
83 their household contacts (HHCs) has not been widely adopted.

84  
85 The recently published RATIONS study randomized more than 10,000 household contacts of persons  
86 with TB in eastern India between a control arm that received routine TB care with no additional in-kind  
87 nutritional supplementation and an intervention arm that received macronutrient and micronutrient  
88 support with a food basket that cost \$13 per month for 6 months.(4) Compared to the control group,  
89 the intervention group experienced a 40% reduction in TB incidence over the following two years. PWTB  
90 in the RATIONS study, who also received nutritional support regardless of whether their household  
91 contacts were in the control or intervention groups, experienced an approximately 35% reduction in  
92 mortality compared to a previous National TB Elimination Program cohort. The RATIONS study shows  
93 the potential nutritional supplementation to prevent TB incidence and mortality among household  
94 contacts of PWTB.

95

96 In this study, we developed a Markov state transition model to explore if a RATIONS-style nutritional  
97 intervention would be cost-effective for reducing TB incidence and mortality in India.

## 98 **METHODS**

99

### 100 **Study Design**

101 We used a Markov cohort model to estimate the long-term costs and health outcomes of providing a  
102 food basket to HIV-negative household contacts of PWTB in India. We parameterized intervention costs  
103 and effect sizes from the results of the RATIONS study, which was conducted among household contacts  
104 of PWTB in Jharkhand, India, in a largely rural population with a high degree of multidimensional  
105 poverty.(4) We conducted the study from the perspective of India’s central government, which funds  
106 the National TB Elimination Program (NTEP). Recognizing that patient costs can often be substantially  
107 larger than provider costs, we also conducted a secondary analysis to estimate results from a societal  
108 perspective, considering costs borne by both patients and the Indian government. We programmed the  
109 model using TreeAge Pro v.22.2.0 (Tree Age, Williamstown, MA).

110

### 111 **Intervention strategies**

112 We modeled two strategies. The “usual intervention” strategy reflects the status quo wherein  
113 household contacts and PWTB do not receive any in-kind nutritional support. In the RATIONS  
114 intervention, HHCs of PWTB receive a food basket that contains a daily multi-micronutrient tablet, rice,  
115 and lentils for 6 months.(4) The food basket provides 23g of protein and a total of 750 Kcal calories daily.  
116 In addition, under the RATIONS intervention we assumed that individuals progressing to TB disease  
117 would receive a nutritional supplement that provided 1200 Kcal with 52g of protein for all six months of  
118 TB treatment.

119

## 120 **Study Model**

121 The Markov model simulates the natural course of TB incidence, cure, and sequelae for a starting cohort  
122 without TB disease. The model was constructed as a set of mutually exclusive health states, with natural  
123 history transitions represented by movements between these health states: development of TB disease,  
124 TB cure, death from TB, and death from other causes (Figure 1). Parameters defining TB incidence rates  
125 were specified to represent differences in the rates of progression to TB disease based on individual  
126 nutritional status. Individuals developing TB disease could die, self-cure, or be cured via treatment.  
127 Individuals who survive TB transition to an early post-treatment state, where they have an elevated risk  
128 of recurrent disease for 12 months as well as increased all-cause mortality. Following 12 months in the  
129 early-post treatment phase, individuals transition to the late post-treatment phase, where they continue  
130 to have increased all-cause mortality, but where their risk of TB disease falls to baseline. We assumed  
131 that after surviving TB, individuals would have a lower average quality of life due to chronic post-TB lung  
132 disease. We used the model to simulate progression of a cohort of 100,000 household contacts of PWTB  
133 through these health states over their lifetime, with a 6-month time step.

134

## 135 **Parameter inputs**

136

### 137 *Health Outcomes*

138 Outcomes from the simulation included TB disease incidence, TB deaths, disability-adjusted life years  
139 (DALYs), and costs from the government perspective. In a secondary analysis, we also considered costs  
140 from a societal perspective. All outcomes were assessed over the lifetime of the modelled cohort.

141

142 We sourced TB incidence rates for HHCs after exposure from a previous meta-analysis.(5) Table 1

143 presents incidence estimates adopted for the analysis for the first five years. After five years of elevated

144 risk of TB disease, we assumed the incidence would drop to prevailing rates in the general Indian  
145 population based on WHO estimates. (3) To account for the long-term secular declines in population TB  
146 incidence rates, we assumed a 3% annual decline based on incidence trends estimated for India over the  
147 past five years (Supplementary Figure 1). In the early post-treatment phase, we assumed that TB  
148 survivors had an increased risk of recurrent TB based on observed data from India.(6) In the late post-  
149 treatment phase, the risk dropped to baseline.

150  
151 We obtained TB case fatality rates from the WHO Global TB Report 2022.(3) For background mortality  
152 rates, we constructed TB-deleted life tables using WHO life tables.(7) For individuals surviving TB, we  
153 estimated a lifetime increase in TB-attributable mortality using previous conservative estimates.(8)

154  
155 To calculate DALYs, we obtained disability weights for TB disease from the Global Burden of Disease  
156 Study 2019.(9) We estimated the disability weight for TB survivors (due to persistent sequelae) to be  
157 0.053 based on a published study of the global burden of post-TB lung disease.(10)

158  
159 *Intervention impact*

160 We assumed that prompt nutritional supplementation would reduce the risk of incident TB disease  
161 among HHCs. Based on the results of the RATIONS study, we assumed an incidence rate ratio of 0.61  
162 (95% CI 0.43, 0.85) for HHCs receiving supplementation compared to no supplementation for two years  
163 from the beginning of the intervention. After two years, we assumed that those receiving the  
164 intervention and those receiving usual care had a similar risk of incident TB disease. We assumed that  
165 PWTB who receive nutritional support have reduced TB-related mortality based on a comparison of  
166 outcomes of PWTB in the RATIONS study to an NTEP cohort, operationalized as a risk ratio of 0.65 (95%  
167 CI: 0.49, 0.85) applied between TB incidence and cure.(6, 11)

168

169 We used cost data from the RATIONS study, which reported supplementation costs of \$13 per month  
170 inclusive of delivery costs. In sensitivity analyses, we examined a wide range of values for the cost of the  
171 nutritional supplementation, to account for regional variation, diversion of food grains, and wastage. We  
172 obtained TB treatment costs from a recent published study.(12) For costs borne by TB patients and  
173 affected households, we assumed that the direct medical costs, direct non-medical costs, and  
174 productivity losses borne by TB-affected household would be \$700 (SD: 140) per TB episode.(13, 14) We  
175 rounded all costs to the nearest dollar. All costs are reported in 2022 US dollars.

176

### 177 **Cost-effectiveness analysis**

178 We employed the model to compare the RATIONS nutritional supplementation intervention to the  
179 status quo. We projected TB cases, TB deaths, disability-adjusted life-years (DALYs) attributable to TB,  
180 and costs for each strategy over the lifetime of the study cohort. We calculated incremental cost-  
181 effectiveness ratios (ICERs) as the ratio of mean incremental costs to mean incremental health benefits,  
182 for the intervention compared to the usual care strategy. Costs and DALYs were discounted at 3% per  
183 annum.(15)

184

### 185 *Willingness-to-pay*

186 We derived our willingness-to-pay (WTP) threshold from Ochalek et al., who estimated country-specific  
187 willingness-to-pay thresholds based on the opportunity cost of healthcare spending.(16) For India, this  
188 study estimated a WTP threshold equivalent to 23% of per-capita GDP (US\$550 in 2022). We considered  
189 ICERs below this threshold to be clearly cost-effective.

190

### 191 **Sensitivity analysis**

192 To assess the robustness of our results, we conducted both deterministic and probabilistic sensitivity  
193 analyses.(17) For the deterministic sensitivity analysis, we defined *a priori* feasible ranges around core  
194 parameter values (Table 1) and then repeated the analysis multiple times, each time varying one  
195 parameter between the maximum and minimum of the feasible range, with other parameters held at  
196 their point estimate. Next, we conducted two-way sensitivity analyses, in which we simultaneously  
197 varied the parameters that emerged as the most important from one-way sensitivity analyses.  
198  
199 Lastly, we performed probabilistic sensitivity analysis (PSA). We defined uncertainty in parameter values  
200 as probability density functions (PDFs) for each model parameter. We then employed 2<sup>nd</sup>-order Monte  
201 Carlo simulation to repeat the analysis 10,000 times, each time drawing a random value for each model  
202 parameter from its PDF. This produced 10,000 estimates for each model outcomes, with the distribution  
203 of these estimates quantifying the uncertainty in model outcomes due to the combined uncertainty  
204 from all model parameters. We report the PSA results using cost-effectiveness acceptability curves.(18)  
205 In addition, we report uncertainty around main analysis results using 95% uncertainty intervals  
206 calculated from the PSA results.

207

## 208 **RESULTS**

### 209 **Base Case Results**

210 Base case results are presented in Table 2. Per 100,000 household contacts, those receiving the  
211 RATIONS intervention had lower cumulative TB incidence over their lifetime compared to those  
212 receiving usual care (6749 cases [95% uncertainty interval (UI): 5524–8520] vs. 7718 [95% UI: 6261–  
213 9734]), risk ratio (RR) 0.87 [95% UI: 0.83–0.93]). In the first two years of this model, there were 1580 TB  
214 cases (95% UI: 1074–2461) in the RATIONS intervention as opposed to 2577 TB cases (95% UI: 1898–



215 3634) with usual care, RR 0.61 (0.48–0.77). These results are consistent with the empirical findings of  
216 the RATIONS trial.

217  
218 The cohort receiving the RATIONS intervention was also estimated to have lower lifetime TB mortality  
219 (906 [95% UI: 667–1288] vs. 1529 [95% UI: 1196–2044] TB deaths, RR 0.59 [95% UI: 0.49–0.72]). In the  
220 first two years, there were 198 TB deaths (95% UI: 127–335) under the RATIONS intervention vs. 479  
221 (95% UI: 343–710) under the usual care strategy (RR 0.41 [95% UI:0.31–0.56]). Per 100,000 individuals,  
222 the RATIONS intervention averted 13,775 DALYs (95% UI: 9036–20,199) compared to usual care. The  
223 majority of DALYs were averted in the RATIONS arm through reductions in TB mortality. Disaggregated  
224 DALY estimates for each strategy are reported in Table 3.

225  
226 Under the governmental perspective total (discounted) costs for the usual care strategy were \$0.76  
227 million (95% UI: 0.52–1.11) per 100,000 individuals, representing the costs of treatment for individuals  
228 developing TB. Total governmental costs under the RATIONS intervention were \$3.93 million (95% UI:  
229 2.89–5.18), with \$0.66 million (95% UI: 0.45–0.96) of this total due to the costs of TB care, and the  
230 remainder due to the costs of the nutritional intervention. Under the societal perspective total cost  
231 were \$5.24 million (95% UI: 2.97–5.68) for the usual care strategy. Total societal costs under the  
232 RATIONS intervention were \$7.76 million (95% UI: 5.71-10.58).

233  
234 The incremental cost-effectiveness ratio of the RATIONS intervention, as compared to the status quo,  
235 was \$229 per DALY averted (95% UI: 133–387) under the healthcare perspective and \$184 (95% UI: 83–  
236 344) under the societal perspective. Both these estimates are below the country specific WTP threshold  
237 of \$550 per DALY averted.

238

## 239 **Sensitivity analysis**

240 One-way sensitivity analyses for the general population showed that the two parameters with the  
241 greatest impact on the ICER were the pre-recipient cost of the RATIONS supplementation (baseline  
242 assumption: \$28.5, range: \$20-100) and the risk ratio of TB incidence for those receiving the nutritional  
243 supplementation (baseline assumption: 0.61, range: 0.43 to 0.85) (Table 4). In threshold analyses, the  
244 cost-effectiveness ratio for the RATIONS intervention was below to the WTP threshold (\$550 per DALY  
245 averted) when the cost of supplementation was less than \$75, indicating that the intervention would be  
246 cost-effective for any supplementation cost below this value. Even when we assumed the risk ratio for  
247 TB incidence was 0.99, the WTP threshold was not exceeded. The model was less sensitive to the risk  
248 reduction in TB mortality, the cost of TB treatment, and the disability weight for post-TB lung disease  
249 (Table 4).

250 In two-way sensitivity analyses, the RATIONS intervention was cost-effective across a large range of  
251 costs of the supplement and risk ratio of TB incidence (Figure 3). When the cost of the supplement for  
252 HHCs was below \$56, the intervention was always cost-effective from the government perspective.  
253 When considering the societal perspective, the intervention remained below the WTP threshold as long  
254 as the supplementation cost was below \$59. We also conducted a two-way sensitivity analysis of the risk  
255 ratios for TB incidence and TB mortality. Even at the lowest estimates of the risk ratio for TB incidence  
256 (0.85) and TB mortality (0.85), the RATIONS intervention remained cost-effective with an ICER of \$514.

257  
258 Lastly, in probabilistic sensitivity analysis, the RATIONS intervention was favored at a WTP of \$550 in  
259 99.95% and 99.97% of model simulations from both the government and societal perspectives,  
260 respectively. Indeed, RATIONS was consistently preferable in >99% of iterations at a WTP of \$440. From  
261 a societal perspective RATIONS was consistently favorable in >99% of iterations at a WTP of \$396. Cost

262 effectiveness acceptability curves demonstrate the points at which RATIONS becomes consistently cost-  
263 effective (Figure 3).

264

## 265 **DISCUSSION**

266 Nutritional interventions to mitigate risks of TB incidence and mortality are often perceived to be cost  
267 prohibitive. However, the RATIONS study has provided empirical evidence that low-cost nutritional  
268 support could have a substantial impact on lowering the risk of incident TB in settings with high rates of  
269 multidimensional poverty and undernutrition. Our analysis suggests that an in-kind nutritional  
270 intervention modelled on the food basket used in the RATIONS study could be cost-effective for  
271 reducing TB incidence and mortality in India. We estimated that RATIONS-style nutritional support  
272 would have a cost-effectiveness of \$229 per DALY averted from a healthcare perspective and \$184 per  
273 DALY averted from a societal perspective. Our findings can help national TB programs as they consider  
274 the economics of implementing nutritional support to reduce the incidence of TB among household  
275 contacts.

276

277 Balanced nutritional interventions likely reduce incident TB disease by enhancing the humoral and  
278 innate responses to *Mycobacterium tuberculosis*; these responses can help infected individuals  
279 eliminate or contain the bacilli.(2) Nutritional support to malnourished individuals may acutely restore  
280 their immune response. Indeed, mouse models suggest that providing a protein-rich diet to protein-  
281 deficient mice can restore their anti-tubercular immune response within two weeks.(19) Given that the  
282 majority of TB disease in high burden settings arises from infection within the past two years, nutritional  
283 support should be provided to HHCs promptly after the diagnosis of the index case to prevent incident  
284 TB disease.(20)

285

286 In our model, we limited the reduction in TB incidence among HHCs to two years after exposure since  
287 this was the duration of follow-up observed in the RATIONS study. For subsequent years, we assumed  
288 that individuals receiving the RATIONS intervention would have the same incidence rate as the usual  
289 care group, which remained elevated in years 3, 4, and 5 since exposure. Given the impact of nutritional  
290 support on the immune response to TB, it is possible that individuals receiving improved nutrition are  
291 more resistant to new TB infection. If so, the incidence reductions produced by the RATIONS  
292 intervention could extend beyond the two years assumed in this analysis. As such, our health impact and  
293 cost-effectiveness estimates may be conservative.

294  
295 It is important to note that that the RATIONS study—on which this cost-effectiveness analysis was  
296 based—was conducted in a population with high levels of material deprivation and undernutrition, and  
297 TB incidence rates higher than those estimated for other parts of India. It is possible that the impact and  
298 cost-effectiveness of nutritional support may be lower in settings with a lower prevalence and severity  
299 of undernutrition, or lower TB incidence. Our two-way sensitivity analysis suggests that even at the  
300 lowest estimates of risk reduction for TB incidence (15% reduction) and mortality (15% reduction), the  
301 intervention would remain below the WTP threshold. These are credible effect sizes in less  
302 impoverished populations. A systematic review, which largely drew on data from high income countries,  
303 found a log-linear relationship between BMI and TB incidence wherein TB incidence decreases by  
304 approximately 14% per  $1\text{kg}/\text{m}^2$  increase in BMI which is entirely achievable in 6 months on the RATIONS  
305 intervention. Further, a systematic review of randomized trials of macronutrient supplementation in  
306 PWTB, despite being underpowered, estimated that macronutrient supplementation was associated  
307 with a RR of 0.34 (95% CI: 0.10–1.20) for TB mortality.(21)

308

309 Public health investments to eliminate TB and undernutrition have historically provided some of the  
310 greatest returns on investment.(22, 23) The ICER estimated for nutritional support in our study is  
311 considerably below both the country-specific WTP threshold for India and the ICER for well-accepted TB  
312 preventive interventions, such as test-driven isoniazid preventive therapy for persons with HIV/AIDS  
313 (\$1154 per DALY averted).(24) In our model, the ICER was most sensitive to the cost of nutritional  
314 supplementation for HHCs. Even when we assumed the lowest possible effect of nutritional  
315 interventions on incident TB disease, nutritional support would be cost-effective at \$56 per recipient  
316 over 6 months, which was nearly twice the cost of the intervention. It is possible that state and national  
317 governments would enjoy economies of scale, not possible in the context of a clinical trial, that  
318 consequently could further lower the cost of the intervention.

319  
320 Our analysis has several limitations. First, we did not model the impact of nutritional interventions on  
321 reducing early relapses and disengagement from care, even though these are plausible effects.(2, 25)  
322 Second, we did not account for reductions in TB transmission and secondary TB cases that might result  
323 from lower TB incidence, and instead focused on the direct health benefits experienced by intervention  
324 recipients. Third, our cost assumptions were limited to drug-susceptible TB, which is less costly to treat  
325 than drug-resistant TB, (13) and we also did not model the medical and non-medical costs faced by  
326 PWTB prior to their diagnosis. Approximately two-thirds of Indian PWTB treated in the public sector first  
327 seek care in the private sector and accrue large costs before an accurate TB diagnosis is made.(13) Forth,  
328 the model did not capture the positive externalities of nutritional support, including improvements in  
329 nutritional status and functional recovery and improved economic productivity among TB survivors,  
330 which have been explored in a previous analysis.(26) Taken together, these limitations suggest that our  
331 ICER estimates will be conservative, and that nutritional support could be even more cost-effective than  
332 we project.

333

334 Improvements in population-level nutrition and progress on social determinants of health likely  
335 contributed to the massive decline in TB incidence and mortality in countries like the United States and  
336 the United Kingdom that occurred even prior to the introduction of antimicrobials.(25) The striking  
337 findings of the RATIONS study have demonstrated the role nutritional interventions can play in the  
338 contemporary era to accelerate TB elimination. India is well positioned to institute a large-scale  
339 nutritional support program as it already has well-established infrastructure for delivering in-kind  
340 rations, mid-day meals, and nutritional counseling.(27-29) The TB Mitra Program, which crowdsources  
341 nutritional support for persons with TB, could also be scaled up.(30)

342

343 Additional research is necessary to help us understand how to target nutritional interventions equitably  
344 and efficiently. Operational studies are needed to design optimal delivery systems. Even as nutritional  
345 interventions are operationalized in settings with lower prevalence of undernutrition in India,  
346 epidemiological studies can help us understand the effect size of nutritional interventions in diverse  
347 populations. We also need clinical and translational studies to better define the nutritional needs of  
348 special populations, such as pregnant women and children, to develop the best possible nutritional  
349 package. Economic evaluations should be conducted alongside nutritional intervention studies to inform  
350 policy.

351

352 In conclusion, our analysis projected that a RATIONS-style intervention would be cost-effective for  
353 populations with a high dual burden of TB and undernutrition in India and drive large reductions in TB  
354 incidence and mortality among household contacts of persons with TB.

355

356

357 **FUNDING**

358 This work was supported by the National Institutes of Health [grant number K01AI167733-01A1 to PS] ;  
359 the Burroughs Wellcome/ASTMH Postdoctoral fellowship to PS; US Civilian Research and Development  
360 Foundation [grant number USB-31150-XX-13 to PS] with federal funds from the Government of India's  
361 Department of Biotechnology, the Indian Council of Medical Research, the National Institutes of Health,  
362 the National Institute of Allergy and Infectious Diseases, and the Office of AIDS Research and distributed  
363 in part by CRDF Global [DAA3-19-65673-1]; grant from the Warren Alpert Foundation to PS); and a  
364 career investment award by the Department of Medicine at Boston University Chobanian & Avedisian  
365 School of Medicine. The funders had no role in study design, analysis, or reporting.

366

367 **CONFLICTS OF INTEREST**

368 We do not report any conflicts of interest.

369

370 **TABLES AND FIGURES**

371

372 **Table 1: Model assumptions**

| Model Parameters                                           | Point estimate (Ranges)                                                                                                                                                                               | Distribution | Sources                                                   |
|------------------------------------------------------------|-------------------------------------------------------------------------------------------------------------------------------------------------------------------------------------------------------|--------------|-----------------------------------------------------------|
| Monthly cost of nutritional support for household contacts | \$4.75 (standard deviation: 0.95)                                                                                                                                                                     | Gamma        | Bhargava et al. (2023)(4)                                 |
| Monthly cost of nutritional support for persons with TB    |                                                                                                                                                                                                       |              |                                                           |
| Cost of nutritional support for persons with TB (6 months) | \$14.7 (standard deviation: 2.9)                                                                                                                                                                      | Gamma        | Bhargava et al. (2023)(11)                                |
| Cost of TB treatment (healthcare perspective)              | \$102.77 (standard deviation: 15)                                                                                                                                                                     | Gamma        | Chatterjee et al. (2021)(12)                              |
| Cost of TB treatment (societal perspective)                | \$700 (standard deviation: 70)                                                                                                                                                                        | Gamma        | Sinha et al. (2020) (13)<br>Portnoy et al. (2023) (14)    |
| Risk ratio incidence                                       | 0.61 (0.43-0.85)                                                                                                                                                                                      | PERT         | Bhargava et al. (2023) (4)                                |
| Risk ratio mortality                                       | 0.65 (0.49-0.85)                                                                                                                                                                                      | PERT         | Bhargava et al. (2023)(11)<br>Velayutham et al. (2018)(6) |
| Start Age                                                  | 40 years                                                                                                                                                                                              | -            |                                                           |
| TB Incidence rate per 100,000                              | Year 1: 1478 (897-2427)<br>Year 2: 831 (624-1106)<br>Year 3: 1101 (757-1599)<br>Year 4: 492 (344-704)<br>Year 4: 549 (415-726)<br>Beyond year 5: National TB incidence rates declining at 3% annually | -            | Fox et al (2013).(5)<br>Global TB report 2022(1)          |
| Case fatality rate                                         | 17% (12%-24%)                                                                                                                                                                                         | PERT         | WHO global TB report 2022(1)                              |
| Annual disability weight of TB disease                     | 0.333 (0.224-0.454)                                                                                                                                                                                   | Beta         | Global burden of disease 2019 (9)                         |
| Annual disability weight for post-TB disability            | 0.053 (0.026-0.079)                                                                                                                                                                                   | Beta         | Quaife et al. (2020) (10)                                 |
| Post-TB mortality risk ratio                               | 1.14 (1.02-1.34)                                                                                                                                                                                      | PERT         | Menzies et al. (2021) (8)                                 |
| Risk of recurrent TB after treatment completion            | 0.13 (0.10-0.16)                                                                                                                                                                                      | Beta         | Velayutham et al. (2018)                                  |

373

374

375

376

377

378

379

380

381

382

383



384 **Table 2: Outcomes per 100,000 individuals**

385 (DALYs: disability-adjusted life years; ICER: incremental cost effectiveness ratio [\$/DALYs averted]. Costs  
386 and DALYs discounted)

387

| Strategy   | DALYs (95% CI)            | Healthcare cost (95% CI)       | Healthcare ICER (95% CI) | Societal cost (95% CI)         | Societal ICER (95% ICER) |
|------------|---------------------------|--------------------------------|--------------------------|--------------------------------|--------------------------|
| Usual care | 41,172<br>(35,673-49,015) | \$0.76 million<br>(0.52-1.11)  | Ref                      | \$5.24 million<br>(2.97-5.68)  | Ref                      |
| RATIONS    | 27,397<br>(22,208-35,452) | \$ 3.93 million<br>(2.89-5.18) | \$229 (133-387)          | \$7.76 million<br>(5.71-10.58) | \$184<br>(83-344)        |

388

389

390 **Table 3: Sources of DALYs per 100,000 in the two strategies**

391

| Component of Disability-adjusted Life Years                | Usual care                | RATIONS                   |
|------------------------------------------------------------|---------------------------|---------------------------|
| Years lost to TB mortality                                 | 29,705<br>(22,820-40,615) | 16,951<br>(12,298-24,682) |
| Years lost to incremental post-TB mortality                | 6,209<br>(2087-13,596)    | 5,760<br>(1958-12,589)    |
| Years lost to disability from TB disease                   | 1,245<br>(877-1784)       | 1,071<br>(756-1538)       |
| Years lost to disability from post-TB chronic lung disease | 4,013<br>(2910-5544)      | 3,615<br>(2626-5027)      |
| Total                                                      | 41,172<br>(35,673-49,015) | 27,397<br>(22,208-35,452) |

392

393

394

395

396

397

398

399

400

401

402

403

404

405

406

407

408

409

410

411

412

413  
414

**Table 4: Results of one-way sensitivity analyses from a healthcare perspective**

| <b>Variable Description</b>                      | <b>Variable Low</b> | <b>Variable Base</b> | <b>Variable High</b> | <b>Impact on ICER</b> | <b>ICER Low</b> | <b>ICER High</b> |
|--------------------------------------------------|---------------------|----------------------|----------------------|-----------------------|-----------------|------------------|
| Incremental cost of supplement for HHC (\$)      | 20                  | 28.5                 | 100                  | Increase              | 125             | 675              |
| Risk ratio of TB incidence                       | 0.43                | 0.61                 | 0.85                 | Increase              | 132             | 288              |
| Risk ratio of TB mortality                       | 0.49                | 0.65                 | 0.85                 | Increase              | 147             | 262              |
| Case fatality rate in usual group                | 0.12                | 0.17                 | 0.24                 | Decrease              | 142             | 237              |
| Incremental cost of supplement for PWTB (\$)     | 40                  | 88.2                 | 200                  | Increase              | 161             | 236              |
| Probability of TB recurrence                     | 0.04                | 0.06726              | 0.12                 | Decrease              | 171             | 191              |
| Cost of TB treatment (\$)                        | 100                 | 700                  | 300                  | Decrease              | 214             | 229              |
| Annual disability weight of post-TB lung disease | 0.0265              | 0.053                | 0.0795               | Decrease              | 181             | 186              |
| Risk ratio of post-TB mortality                  | 1.02                | 1.14                 | 1.34                 | Decrease              | 183             | 184              |

415  
416  
417  
418  
419  
420  
421  
422  
423  
424  
425  
426  
427  
428  
429  
430  
431  
432  
433  
434  
435  
436  
437  
438  
  
439  
  
440  
  
441

442 **Figure 1: State transition diagram of model**

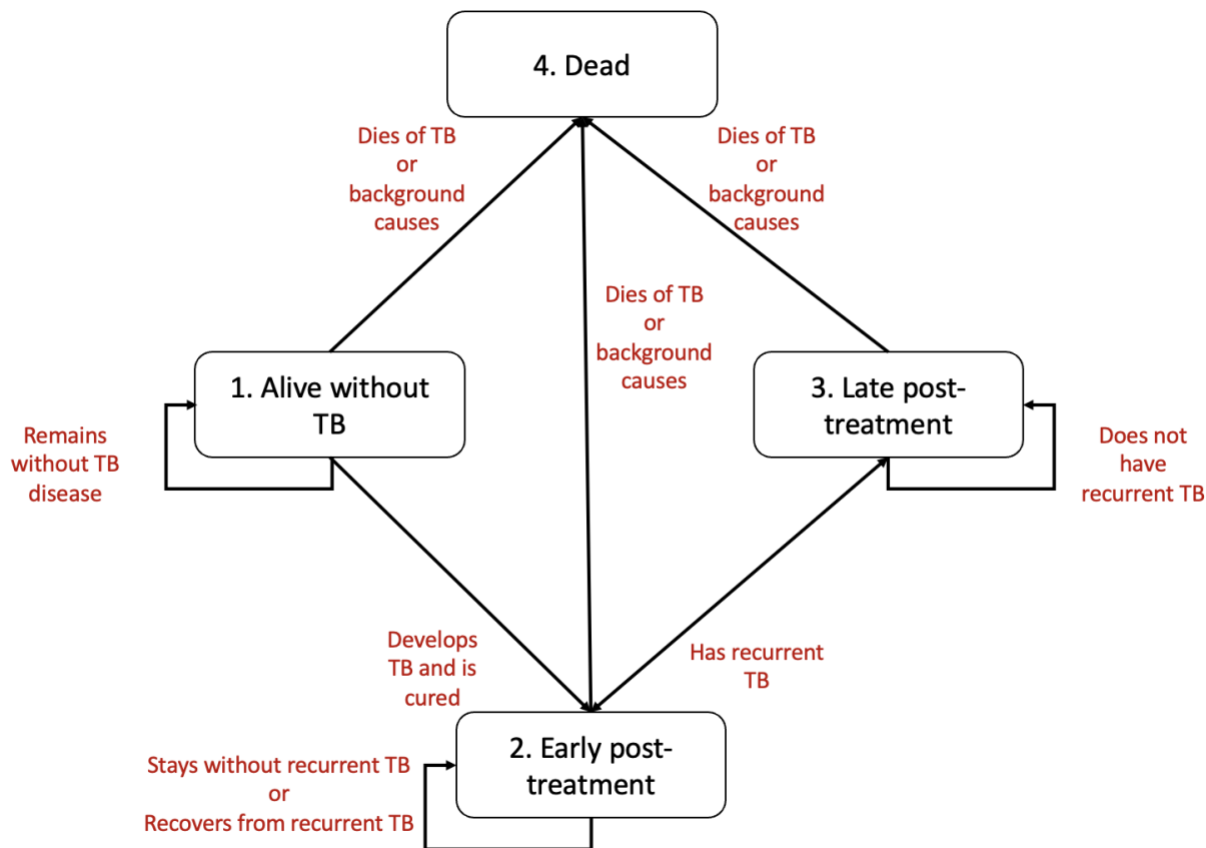

443

444

445

446

447

448

449

450

451

452

453

454

455

456

457

458

459

460

461

462

463 **Figure 3: Two-way sensitivity analysis of the cost of intervention and risk ratio of TB incidence** Areas  
464 shaded blue denote that the intervention would be clearly cost-effective and red shaded regions  
465 indicate that the willingness-to-pay threshold of \$550 was exceeded from the government perspective  
466 and usual care is preferred.  
467

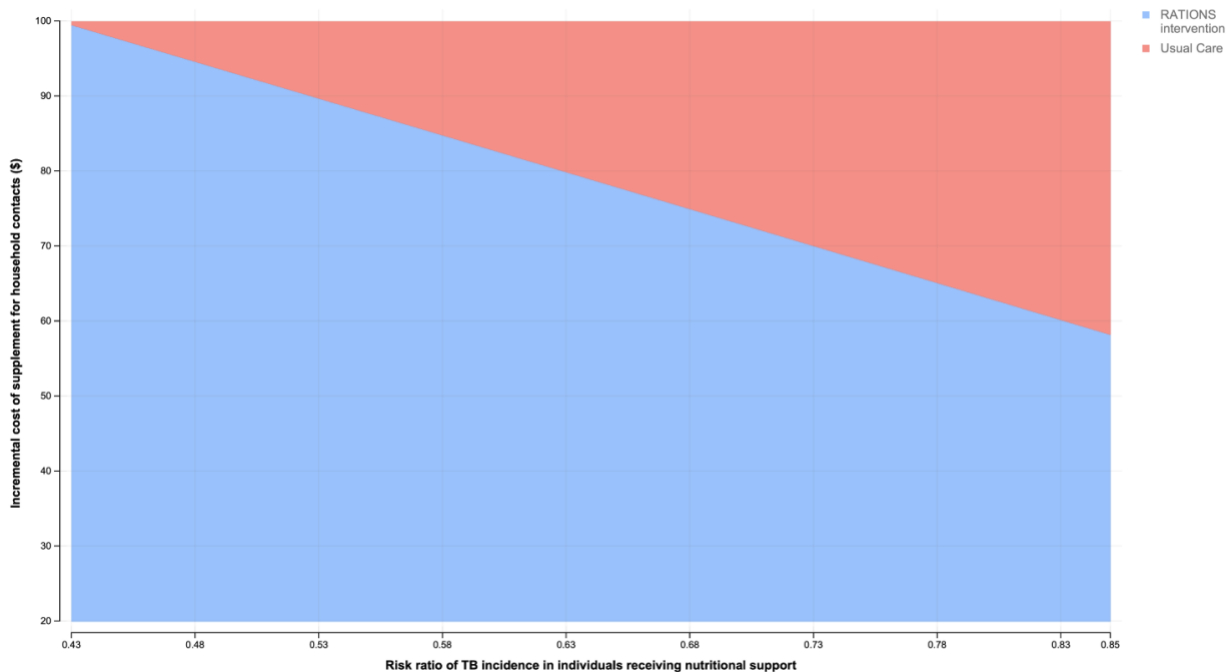

468  
469  
470  
471  
472  
473  
474  
475  
476  
477  
478  
479  
480  
481  
482  
483  
484  
485  
486  
487  
488  
489  
490  
491  
492

493 **Figure 4: Cost-effectiveness acceptability curves**

494 Cost-effectiveness acceptability curves for the models with A. government perspective and B. societal  
495 perspective. The blue line denotes the RATIONS intervention, and the red line indicates usual care. X-  
496 axis denotes willingness-to-pay and the Y-axis denotes the percentage of iterations (out of 10,000  
497 iterations) in which a particular strategy was favored for a particular willingness-to-pay threshold. Areas  
498 shaded blue are below the willingness-to-pay threshold of \$550 and those shaded red are above that  
499 threshold.

500 **A.**

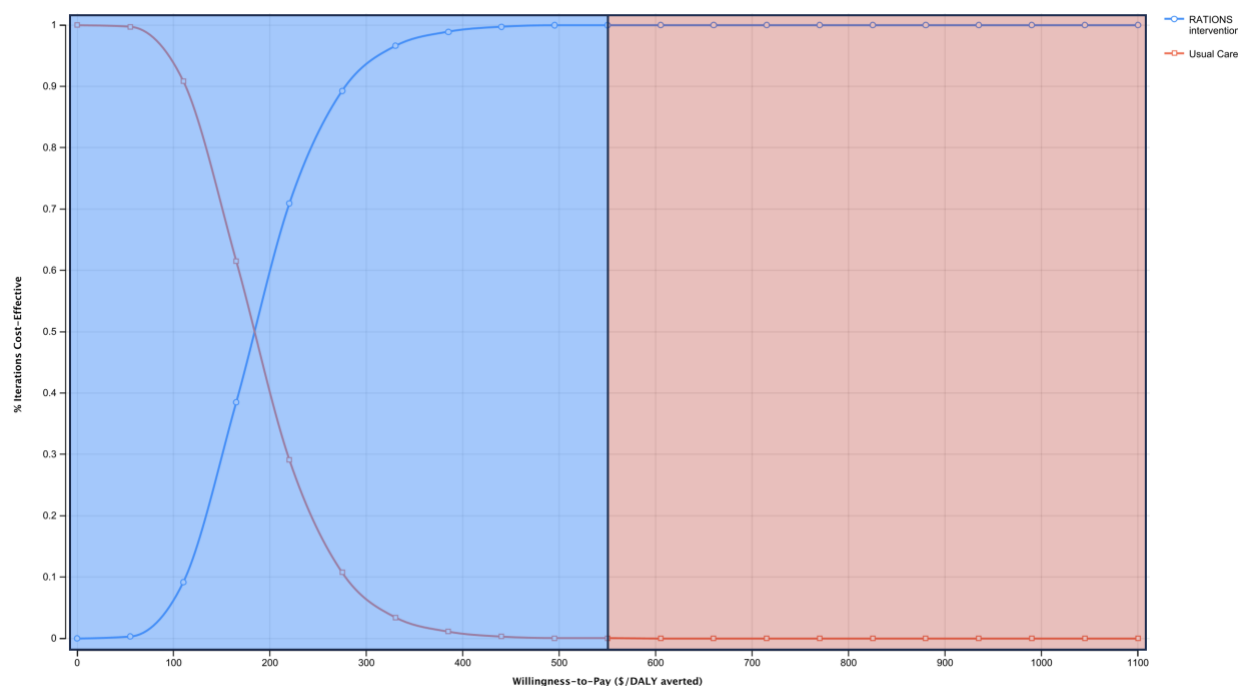

501  
502

**B.**

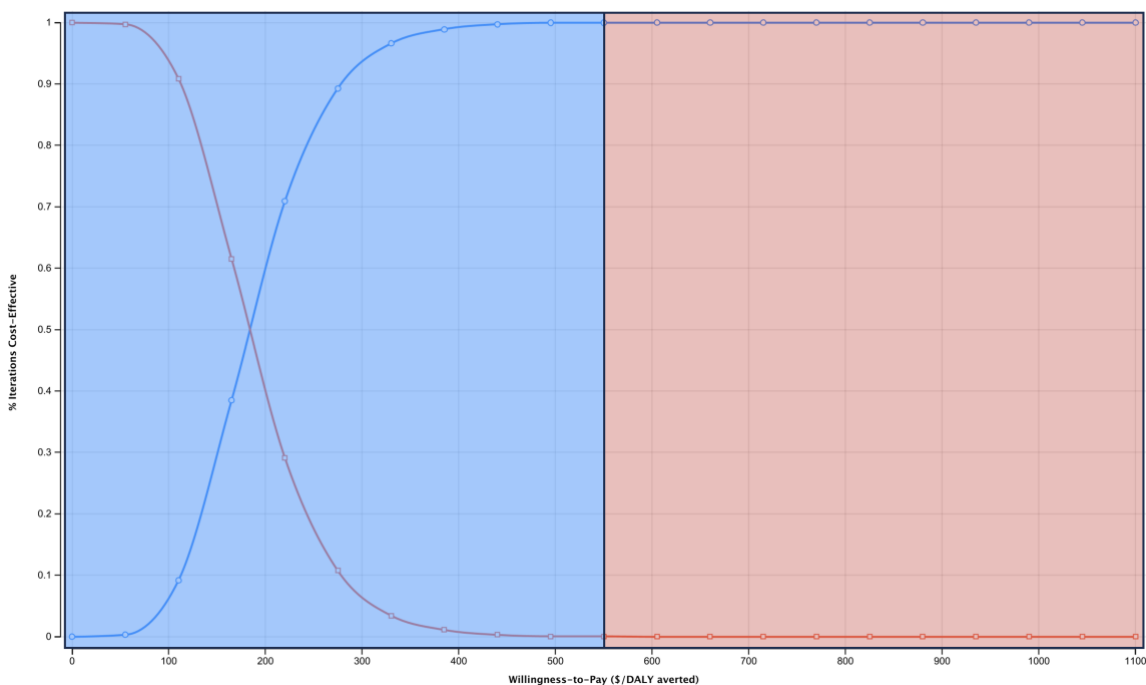

503

504  
505 **Supplementary Figure 1:** TB incidence assumptions for the model. The first five years, the incidence is  
506 elevated as reported in a previous systematic review.(5) Thereafter, we projected that the incidence  
507 would drop to the TB incidence rate in India as defined in the WHO Global Tuberculosis Report 2022. We  
508 assumed an annual 3% decrease in incidence due to secular reasons.  
509

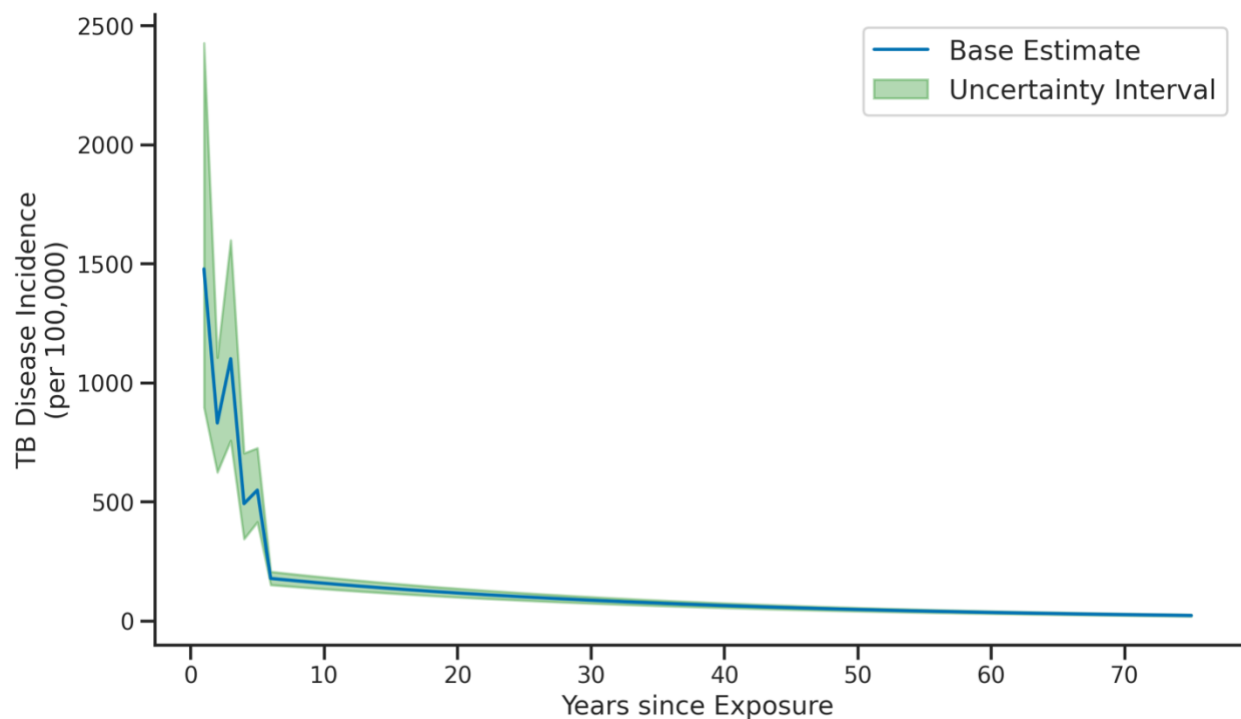

510  
511  
512  
513  
514  
515  
516  
517  
518  
519  
520  
521  
522  
523  
524  
525  
526  
527  
528  
529  
530  
531

532 **References**

- 533
- 534 1. World Health Organization. Global tuberculosis report 2022. WHO, Geneva. 2022.
- 535 2. Sinha P, Davis J, Saag L, Wanke C, Salgame P, Mesick J, et al. Undernutrition and tuberculosis:
- 536 public health implications. *The Journal of infectious diseases*. 2019;219(9):1356-63.
- 537 3. Sinha P, Ponnuraja C, Gupte N, Babu SP, Cox SR, Sarkar S, et al. Impact of Undernutrition on
- 538 Tuberculosis Treatment Outcomes in India: A Multicenter Prospective Cohort Analysis. *Clin*
- 539 *Infect Dis*. 2022.
- 540 4. Bhargava A, Bhargava M, Meher A, Benedetti A, Velayutham B, Teja GS, et al. Nutritional
- 541 supplementation to prevent tuberculosis incidence in household contacts of patients with
- 542 pulmonary tuberculosis in India (RATIONS): a field-based, open-label, cluster-randomised,
- 543 controlled trial. *The Lancet*. 2023.
- 544 5. Fox GJ, Barry SE, Britton WJ, Marks GB. Contact investigation for tuberculosis: a systematic
- 545 review and meta-analysis. *European Respiratory Journal*. 2013;41(1):140-56.
- 546 6. Velayutham B, Chadha VK, Singla N, Narang P, Gangadhar Rao V, Nair S, et al. Recurrence of
- 547 tuberculosis among newly diagnosed sputum positive pulmonary tuberculosis patients treated
- 548 under the Revised National Tuberculosis Control Programme, India: A multi-centric prospective
- 549 study. *PLoS One*. 2018;13(7):e0200150.
- 550 7. World Health Organization. Life tables by country: India [Available from:
- 551 <https://apps.who.int/gho/data/view.main.60740?lang=en>.
- 552 8. Menzies NA, Quaife M, Allwood BW, Byrne AL, Coussens AK, Harries AD, et al. Lifetime
- 553 burden of disease due to incident tuberculosis: a global reappraisal including post-tuberculosis
- 554 sequelae. *The Lancet Global health*. 2021;9(12):e1679-e87.
- 555 9. Vos T, Lim SS, Abbafati C, Abbas KM, Abbasi M, Abbasifard M, et al. Global burden of 369
- 556 diseases and injuries in 204 countries and territories, 1990–2019: a systematic analysis for the
- 557 Global Burden of Disease Study 2019. *The Lancet*. 2020;396(10258):1204-22.
- 558 10. Quaife M, Houben RM, Allwood B, Cohen T, Coussens AK, Harries AD, et al. Post-
- 559 tuberculosis mortality and morbidity: valuing the hidden epidemic. *The Lancet Respiratory*
- 560 *medicine*. 2020;8(4):332.
- 561 11. Bhargava A, Bhargava M, Meher A, Teja GS, Velayutham B, Watson B, et al. Nutritional
- 562 support for adult patients with microbiologically confirmed pulmonary tuberculosis: outcomes
- 563 in a programmatic cohort nested within the RATIONS trial in Jharkhand, India. *The Lancet*
- 564 *Global Health*. 2023;11(9):e1402-e11.
- 565 12. Chatterjee S, Toshniwal M, Bhide P, Sachdeva K, Rao R, Laurence Y, et al. Costs of TB
- 566 services in India (No 1). *The International Journal of Tuberculosis and Lung Disease*.
- 567 2021;25(12):1013-8.
- 568 13. Sinha P, Carwile M, Bhargava A, Cintron C, Acuna-Villaorduna C, Lakshminarayan S, et al.
- 569 How much do Indians pay for tuberculosis treatment? A cost analysis. *Public Health Action*.
- 570 2020;10(3):110-7.
- 571 14. Portnoy A, Yamanaka T, Nguhiu P, Nishikiori N, Baena IG, Floyd K, et al. Costs incurred by
- 572 people receiving tuberculosis treatment in low-income and middle-income countries: a meta-
- 573 regression analysis. *The Lancet Global Health*. 2023;11(10):e1640-e7.

- 574 15. Wilkinson T, Sculpher MJ, Claxton K, Revill P, Briggs A, Cairns JA, et al. The International  
575 Decision Support Initiative Reference Case for Economic Evaluation: An Aid to Thought. *Value*  
576 *Health*. 2016;19(8):921-8.
- 577 16. Ochalek J, Lomas J, Claxton K. Estimating health opportunity costs in low-income and  
578 middle-income countries: a novel approach and evidence from cross-country data. *BMJ global*  
579 *health*. 2018;3(6):e000964.
- 580 17. Briggs AH, Weinstein MC, Fenwick EA, Karnon J, Sculpher MJ, Paltiel AD. Model parameter  
581 estimation and uncertainty: a report of the ISPOR-SMDM Modeling Good Research Practices  
582 Task Force--6. *Value Health*. 2012;15(6):835-42.
- 583 18. Fenwick E, O'Brien BJ, Briggs A. Cost-effectiveness acceptability curves--facts, fallacies and  
584 frequently asked questions. *Health Econ*. 2004;13(5):405-15.
- 585 19. Chan J, Tian Y, Tanaka KE, Tsang MS, Yu K, Salgame P, et al. Effects of protein calorie  
586 malnutrition on tuberculosis in mice. *Proceedings of the National Academy of Sciences*.  
587 1996;93(25):14857-61.
- 588 20. Dowdy DW, Behr MA. Are we underestimating the annual risk of infection with  
589 *Mycobacterium tuberculosis* in high-burden settings? *The Lancet Infectious Diseases*.  
590 2022;22(9):e271-e8.
- 591 21. Grobler L, Nagpal S, Sudarsanam TD, Sinclair D. Nutritional supplements for people being  
592 treated for active tuberculosis. *Cochrane Database of Systematic Reviews*. 2016;2016(6).
- 593 22. Estill J, Islam T, Houben RM, Rudman J, Ragonnet R, McBryde ES, et al. Tuberculosis in the  
594 Western Pacific Region: Estimating the burden of disease and return on investment 2020–2030  
595 in four countries. *The Lancet Regional Health–Western Pacific*. 2021;11.
- 596 23. Hoddinott J, Rosegrant M, Torero M. Hunger and malnutrition. *Copenhagen Consensus*;  
597 2012.
- 598 24. Kapoor S, Gupta A, Shah M. Cost-effectiveness of isoniazid preventive therapy for HIV-  
599 infected pregnant women in India. *The International Journal of Tuberculosis and Lung Disease*.  
600 2016;20(1):85-92.
- 601 25. Carwile ME, Hochberg NS, Sinha P. Undernutrition is feeding the tuberculosis pandemic: a  
602 perspective. *Journal of Clinical Tuberculosis and Other Mycobacterial Diseases*. 2022:100311.
- 603 26. Sinha P, Lakshminarayanan SL, Cintron C, Narasimhan PB, Locks LM, Kulatilaka N, et al.  
604 Nutritional Supplementation Would Be Cost-Effective for Reducing Tuberculosis Incidence and  
605 Mortality in India: The Ration Optimization to Impede Tuberculosis (ROTI-TB) Model. *Clinical*  
606 *infectious diseases : an official publication of the Infectious Diseases Society of America*.  
607 2022;75(4):577-85.
- 608 27. Bhattacharya S, Falcao VL, Puri R. The Public Distribution System in India: Policy Evolution  
609 and Program Delivery Trends. In: Bhattacharya S, Falcao VL, Puri R, editors. *The 15 Billion*  
610 *People Question: Food, Vouchers, or Cash Transfers?: The World Bank*; 2017. p. 43-105.
- 611 28. Navaneethan P, Kalaivani T, Rajasekaran C, Sunil N. Nutritional status of children in rural  
612 India: a case study from Tamil Nadu, first in the world to initiate the Mid-Day Meal scheme.  
613 *Health*. 2011;3(10):647.
- 614 29. Scott K, Glandon D, Adhikari B, Ummer O, Javadi D, Gergen J. India's auxiliary nurse-  
615 midwife, anganwadi Worker, and accredited social health activist programs. *Health for the*  
616 *People: National Community Health Programs from Afghanistan to Zimbabwe* Edited by Perry H  
617 Washington, DC, USA: USAID/Maternal and Child Survival Program. 2020:113-33.



618 30. National Tuberculosis Elimination P. Ni-kshay Mitra. Ministry of Health & Family Welfare.  
619
